# Supplementary material for: Ammonia synthesis using a stable electride as an electron donor and reversible hydrogen store
Source: Springer Nature journal article supplement (doi:10.1038/nchem.1476), 2012-10-19
Supplement: 41557_2012_BFnchem1476_MOESM131_ESM.pdf [file 41557_2012_BFnchem1476_MOESM131_ESM.pdf]

# Ammonia synthesis using a stable electrone as an electron donor and reversible hydrogen store

*Masaaki Kitano,<sup>1</sup> Yasunori Inoue,<sup>1</sup> Youhei Yamazaki,<sup>1</sup> Fumitaka Hayashi,<sup>2</sup> Shinji*

*Kanbara,<sup>1</sup> Satoru Matsuishi,<sup>2</sup> Toshiharu Yokoyama,<sup>2</sup> Sung-Wng Kim,<sup>2, #</sup> Michikazu*

*Hara,<sup>1,\*</sup> and Hideo Hosono<sup>1,2,\*</sup>*

<sup>1</sup>Materials and Structures Laboratory, Tokyo Institute of Technology, 4259 Nagatsuta,  
Midori-ku, Yokohama 226-8503, Japan.

<sup>2</sup>Frontier Research Center, Tokyo Institute of Technology, 4259 Nagatsuta, Midori-ku,  
Yokohama 226-8503, Japan.

<sup>#</sup> Present address : Department of Energy Sciece, SungKyunKwan University, Suwon,  
Korea.

## Supplementary Methods

### Preparation of Ru catalyst on various supports

**Ru/ $\gamma$ -Al<sub>2</sub>O<sub>3</sub>:**  $\gamma$ -Al<sub>2</sub>O<sub>3</sub> was heated at 500 °C for 5 h in air. The obtained powder was dispersed in a solution of Ru<sub>3</sub>(CO)<sub>12</sub> in tetrahydrofuran (THF) for 4 h at room temperature. After evaporation and drying, the sample was heated at 450 °C for 2 h in vacuum and reduced in a stream of H<sub>2</sub> at 400 °C for 4 h.

**Ru/CaO, Ru/CaO–Al<sub>2</sub>O<sub>3</sub> (CA):** CA powders were synthesized by conventional solid-state reaction using a stoichiometric mixture of high purity CaCO<sub>3</sub> and  $\alpha$ -Al<sub>2</sub>O<sub>3</sub> at 1300 °C for 12 h in air. Ru loading on CA and CaO was achieved using the same

method as that for Ru/C12A7:e<sup>-</sup>.

Cs-Ru/MgO, Ba-Ru/activated carbon (AC): The alkali-promoted catalysts Cs-Ru/MgO and Ba-Ru/AC were prepared according to previous reports<sup>11,33</sup>. Cs and Ba oxide species deposited near Ru particles on MgO and AC donate electrons to Ru. The Cs-Ru/MgO catalyst was prepared by the following procedure. MgO was heated in high vacuum at 500 °C for 6 h and then dispersed in a solution of Ru<sub>3</sub>(CO)<sub>12</sub> in THF for 4 h at room temperature. After evaporating the solvent at 40 °C, the obtained powder was slowly heated to 450 °C in high vacuum to decompose the carbonyl precursor. The dark gray powder obtained was dispersed in a solution of Cs<sub>2</sub>CO<sub>3</sub> in absolute ethanol by stirring for 3 h, after which the solvent was evaporated and the catalyst was dried in vacuum. The atomic ratio of Cs/Ru in the catalyst was 1.0. The Ba-Ru/AC catalyst was prepared by the following procedure. The AC support was impregnated with a solution of Ru<sub>3</sub>(CO)<sub>12</sub> in THF in a rotary evaporator at room temperature. After evaporating the solvent at 40 °C, the obtained powder was heated to 450 °C in high vacuum and reduced in a stream of H<sub>2</sub> at 400 °C for 4 h. The promoter was introduced using the wet impregnation method with an aqueous solution of Ba(NO<sub>3</sub>)<sub>2</sub> at room temperature. The sample impregnated with the promoter was dried in air at 120 °C for 10 h. The molar ratio of Ba/Ru in the catalyst was 6.2.

#### Measurement of the electron density of Ru/C12A7:e<sup>-</sup>

An iodometric titration method<sup>1</sup> was used to confirm the presence of electrons and quantify the electron concentration ( $N_e$ ) in the Ru/C12A7:e<sup>-</sup> catalyst. Approximately 10 mg of catalyst was dispersed in an aqueous I<sub>2</sub> solution ( $5.0 \times 10^{-3}$  M, 3 mL), and then 0.1 mL of HCl was poured into the solution. After confirming complete dissolution of the sample, the amount of residual I<sub>2</sub> was titrated using sodium thiosulfate solution ( $5.0 \times 10^{-3}$  M). Observation of the endpoint was enhanced by adding a few drops of starch solution, which induces a violet coloration. The average electron density was obtained from three independent measurements.

#### Kinetic analysis

The kinetic analyses on Ru/C12A7:e<sup>-</sup> are based on references published elsewhere<sup>2,3</sup>. The reaction orders with respect to N<sub>2</sub> and H<sub>2</sub> were obtained at a constant flow rate (60 mL min<sup>-1</sup>), using Ar gas as a diluent and that for NH<sub>3</sub> was determined with (3H<sub>2</sub>+N<sub>2</sub>) by changing the synthesis gas flow rate. The constituent gases of the reactant (N<sub>2</sub>, H<sub>2</sub>, Ar) were as follows in mL min<sup>-1</sup>: (5, 15, 0), (10, 30, 0), (15, 45, 0), and (20, 60, 0) for NH<sub>3</sub> order; (6, 30, 24), (10, 30, 20), (15, 30, 15), and (20, 30, 10) for N<sub>2</sub> order, (10, 20, 30),

(10, 30, 20), (10, 40, 10), (10, 50, 0) for H<sub>2</sub> order. These analyses were performed for Ru/C12A7:e<sup>-</sup> and Ru/MgO at 360 °C under 0.1 MPa.

## Supplementary Results

**Supplementary Table S1: Catalytic performance of Ru catalysts on various supports.**

| Catalyst                            | Surface area (m <sup>2</sup> g <sup>-1</sup> ) | Ru loading (wt%) <sup>a</sup> | Dispersion (%) <sup>b</sup> | Particle size (nm) <sup>b</sup> | NH <sub>3</sub> synthesis rate (μmol g <sup>-1</sup> h <sup>-1</sup> ) <sup>c</sup> | TOF (s <sup>-1</sup> ) <sup>d</sup> | TOF (x10 <sup>3</sup> Ru atom <sup>-1</sup> s <sup>-1</sup> ) <sup>e</sup> | NH <sub>3</sub> (vol.%) <sup>f</sup> | Ea (kJ mol <sup>-1</sup> ) <sup>g</sup> |
|-------------------------------------|------------------------------------------------|-------------------------------|-----------------------------|---------------------------------|-------------------------------------------------------------------------------------|-------------------------------------|----------------------------------------------------------------------------|--------------------------------------|-----------------------------------------|
| Ru/γ-Al <sub>2</sub> O <sub>3</sub> | 170                                            | 6.0                           | 12.5                        | 10.6                            | 51                                                                                  | 0.0002                              | 0.02                                                                       | 0.01                                 | 64.4                                    |
| Ru/CaO                              | 3                                              | 1.5                           | 4.9                         | 27.2                            | 158                                                                                 | 0.006                               | 0.30                                                                       | 0.02                                 | 120.1                                   |
| Ba-Ru/AC                            | 310                                            | 1.0                           | 25.2                        | 5.3                             | 148                                                                                 | 0.003                               | 0.42                                                                       | 0.02                                 | 88.8                                    |
|                                     | 310                                            | 9.1                           | 14.3                        | 9.3                             | 2228                                                                                | 0.003                               | 0.69                                                                       | 0.30                                 | 72.5                                    |
| Cs-Ru/MgO                           | 12                                             | 1.0                           | 50.3                        | 2.7                             | 2264                                                                                | 0.013                               | 6.36                                                                       | 0.31                                 | 85.8                                    |
|                                     | 12                                             | 6.0                           | 18.6                        | 7.2                             | 3353                                                                                | 0.008                               | 1.57                                                                       | 0.46                                 | 73.0                                    |
| Ru/C12A7:O <sup>2-</sup>            | 1~2                                            | 1.2                           | 3.4                         | 39.2                            | 546                                                                                 | 0.038                               | 1.28                                                                       | 0.11                                 | 104.6                                   |
|                                     | 1~2                                            | 0.1                           | 15.6                        | 8.5                             | 715                                                                                 | 0.161                               | 25.09                                                                      | 0.10                                 | 53.6                                    |
| Ru/C12A7:e <sup>-</sup>             | 1~2                                            | 0.3                           | 4.1                         | 32.9                            | 1027                                                                                | 0.274                               | 11.09                                                                      | 0.14                                 | 40.0                                    |
|                                     | 1~2                                            | 1.2                           | 3.2                         | 41.3                            | 2757                                                                                | 0.197                               | 6.29                                                                       | 0.38                                 | 49.1                                    |
|                                     | 1~2                                            | 4.0                           | 2.0                         | 68.5                            | 2122                                                                                | 0.076                               | 1.49                                                                       | 0.29                                 | 56.0                                    |

<sup>a</sup>Ru content was determined by ICP-AES. <sup>b</sup>Dispersion and particle size were calculated on the basis of CO chemisorption values, assuming spherical metal particles and the stoichiometry of Ru/CO = 1. <sup>c</sup>NH<sub>3</sub> synthesis conditions: catalyst (0.2 g), synthesis gas (H<sub>2</sub>/N<sub>2</sub> = 3, 60 mL min<sup>-1</sup>), reaction temperature (400 °C), pressure (0.1 MPa). <sup>d</sup>TOF was calculated from the rate of ammonia synthesis divided by the number of CO atoms chemisorbed on the Ru surfaces. <sup>e</sup>TOF was also calculated from the rate of ammonia synthesis divided by the number of Ru atoms deposited on the catalysts. <sup>f</sup>NH<sub>3</sub> mole fraction in the reactor effluent. <sup>g</sup>Ea is the apparent activation energy calculated from Arrhenius plots of the ammonia synthesis rate in the temperature range of 320-400 °C.

**Supplementary Table S2: Catalytic performance of various 1 wt% Ru-loaded catalysts under a low reaction temperature.**

| Catalyst                                     | NH <sub>3</sub> synthesis rate<br>( $\mu\text{mol g}^{-1} \text{h}^{-1}$ ) <sup>a</sup> | TOF ( $\text{s}^{-1}$ ) <sup>b</sup> | NH <sub>3</sub> (vol.%) <sup>c</sup> |
|----------------------------------------------|-----------------------------------------------------------------------------------------|--------------------------------------|--------------------------------------|
| Ru/ $\gamma$ -Al <sub>2</sub> O <sub>3</sub> | 10                                                                                      | $4.0 \times 10^{-5}$                 | 0.001                                |
| Ru/CaO                                       | 12                                                                                      | $4.6 \times 10^{-4}$                 | 0.002                                |
| Ba-Ru/AC                                     | 14                                                                                      | $1.6 \times 10^{-4}$                 | 0.002                                |
| Cs-Ru/MgO                                    | 618                                                                                     | $3.5 \times 10^{-3}$                 | 0.084                                |
| Ru/C12A7:O <sup>2-</sup>                     | 59                                                                                      | $4.1 \times 10^{-3}$                 | 0.008                                |
| Ru/C12A7:e <sup>-</sup>                      | 838                                                                                     | $6.0 \times 10^{-2}$                 | 0.114                                |

<sup>a</sup>NH<sub>3</sub> synthesis conditions: catalyst (0.2 g), synthesis gas (H<sub>2</sub>/N<sub>2</sub> = 3, 60 mL min<sup>-1</sup>), reaction temperature (320 °C), pressure (0.1 MPa). <sup>b</sup>TOF was calculated from the rate of ammonia synthesis divided by the number of CO atoms chemisorbed on the Ru surfaces. <sup>c</sup>NH<sub>3</sub> mole fraction in the reactor effluent.

**Supplementary Table S3: Orders of reaction for ammonia synthesis over various Ru catalysts<sup>a</sup>.**

| Catalyst                          | $\alpha(\text{N}_2)$ | $\beta(\text{H}_2)$ | $\gamma(\text{NH}_3)$ | Reference |
|-----------------------------------|----------------------|---------------------|-----------------------|-----------|
| Ru/C12A7:e <sup>-</sup>           | 0.46                 | 0.97                | -1.0                  | this work |
| Ru/MgO                            | 0.82                 | -0.38               | -0.68                 | this work |
| Ru-Cs/MgO                         | 1.0                  | -1.2                | -0.1                  | (40)      |
| Ru/MgO                            | 0.8                  | -0.5                | -0.6                  | (13)      |
| Ru-La/MgO                         | 0.85                 | -0.15               | -0.17                 | (21)      |
| Ru powder                         | 0.96                 | -0.72               | -0.15                 | (39)      |
| Co <sub>3</sub> Mo <sub>3</sub> N | 0.99                 | 0.8                 | -1.34                 | (41)      |
| Fe(KM1)                           | 0.9                  | 2.2                 | -1.5                  | (40)      |

<sup>a</sup> Where the rate expression is  $r = kP_{\text{N}_2}^\alpha P_{\text{H}_2}^\beta P_{\text{NH}_3}^\gamma$

**Supplementary Table S4: Catalytic performance of used Ru catalysts at 400 °C under pure N<sub>2</sub> atmosphere.**

| Catalyst                | Yield of NH <sub>3</sub><br>( $\mu\text{mol g}^{-1}$ ) <sup>a</sup> |
|-------------------------|---------------------------------------------------------------------|
| Cs-Ru/MgO               | 0                                                                   |
| Ru/C12A7:e <sup>-</sup> | 15.7                                                                |

<sup>a</sup> This reaction was performed under pure N<sub>2</sub> atmosphere (26.7 kPa) using a closed gas-circulation system [Reaction conditions: catalyst (0.9 g), pressure of N<sub>2</sub> (26.7 kPa), reaction temperature (400 °C), reaction time (6 h)]. Before the reaction, these catalyst was heated in a silica glass flow setup at 400 °C under a pressure of 0.1 MPa (H<sub>2</sub>:N<sub>2</sub> = 3:1).

## References

1. Yoshizumi, T., Matsuishi, S., Kim, S. W., Hosono, H. & Hayashi, K. Iodometric determination of electrons incorporated into cages in 12CaO·7Al<sub>2</sub>O<sub>3</sub> Crystals. *J. Phys. Chem. C* **114**, 15354–15357 (2010).
2. Siporin, S. E. & Davis, R. J. Use of kinetic models to explore the role of base promoters on Ru/MgO ammonia synthesis catalysts. *J. Catal.* **225**, 359-368 (2004).
3. Aika, K. *et al.* Support and promoter effect of ruthenium catalyst. III. Kinetics of ammonia synthesis over various Ru catalysts. *Appl. Catal. A* **28**, 57-68 (1986).
